# Supplementary material for: Quantitative increase in T regulatory cells enhances bone remodeling in osteogenesis imperfecta
Source: PubMed Central journal article supplement — iScience. 2022 Aug 5;25(9):104818. doi: 10.1016/j.isci.2022.104818 (PMC9400089; doi:10.1016/j.isci.2022.104818), 2022-08-05
Supplement: mmc1.pdf [file mmc1.pdf]

iScience, Volume 25

## **Supplemental information**

**Quantitative increase in T regulatory cells**

**enhances bone remodeling**

**in *osteogenesis imperfecta***

**In-Hong Kang, Uday K. Baliga, Shilpak Chatterjee, Paramita Chakraborty, Seungho Choi, Nathan Buchweitz, Hong Li, Yongren Wu, Hai Yao, Shikhar Mehrotra, and Meenal Mehrotra**

**Figure S1**

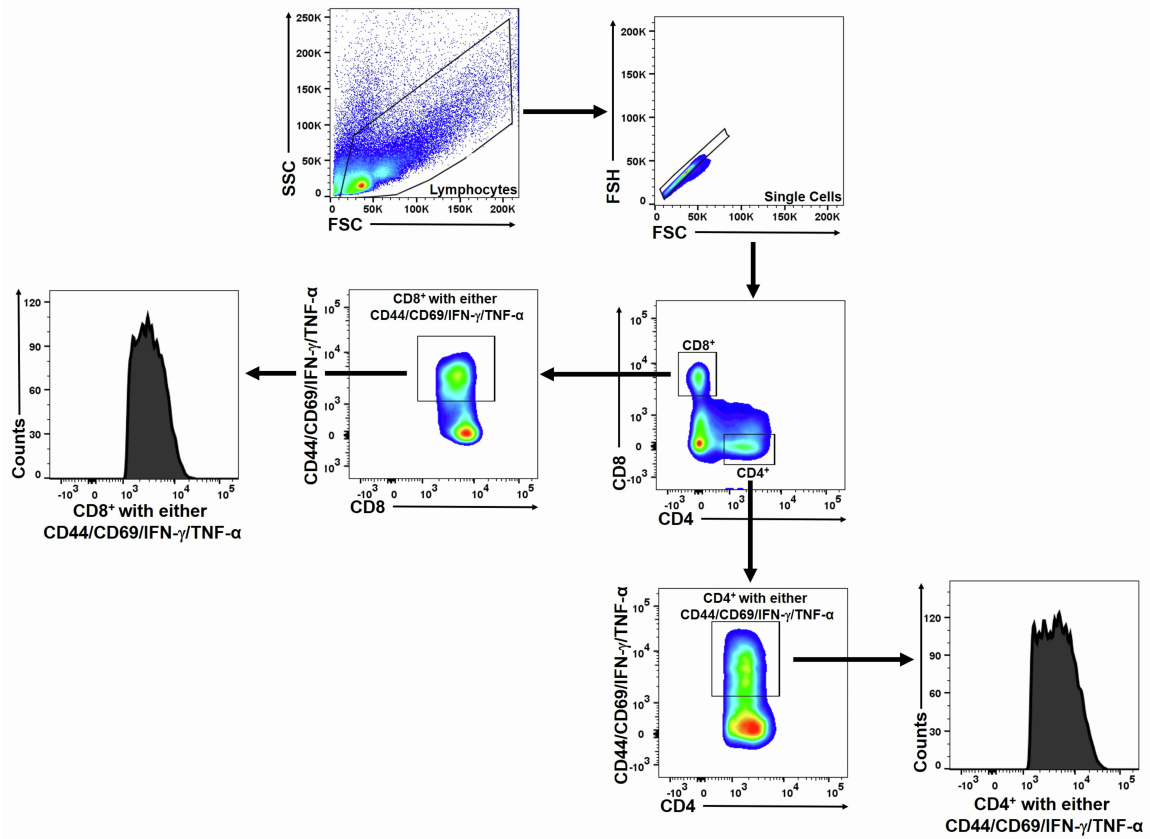

**Figure S2**

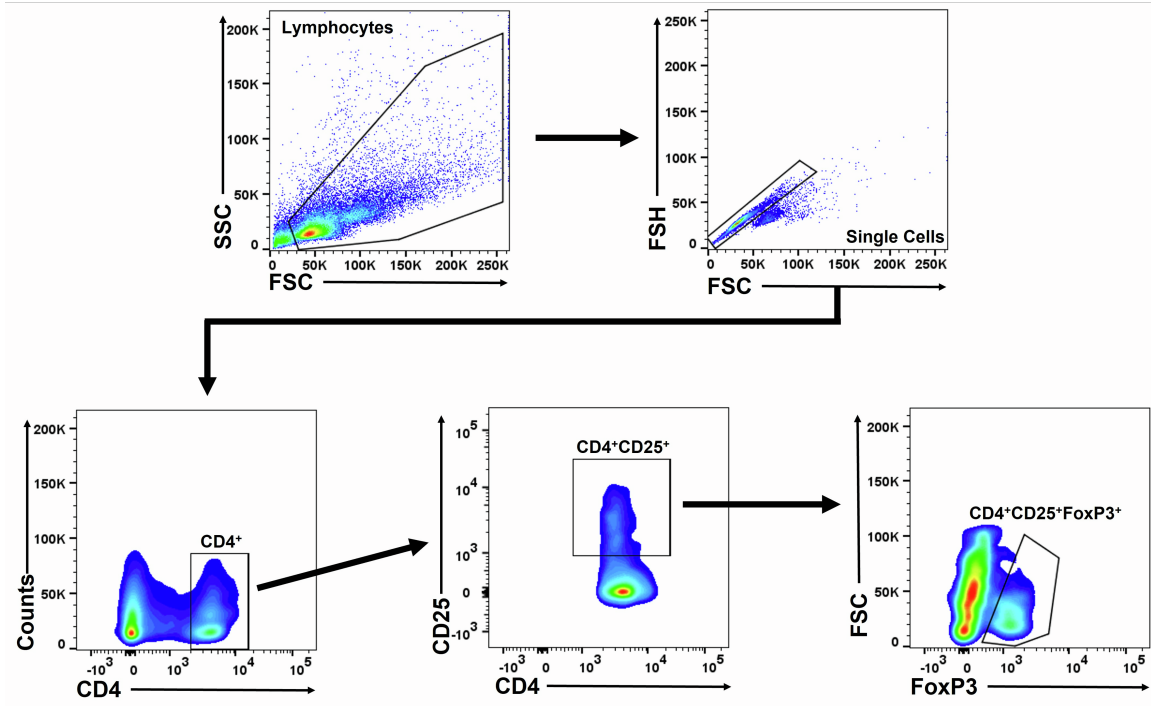

**Figure S3**

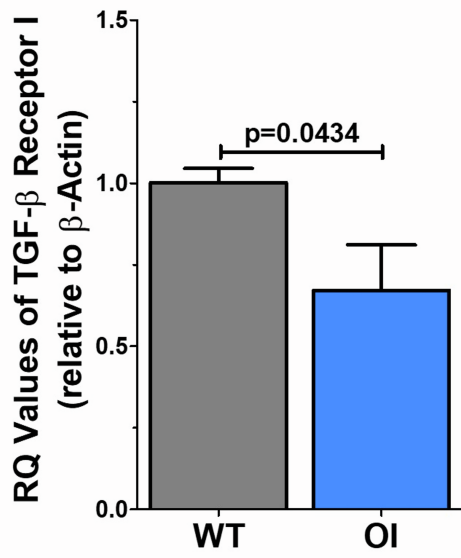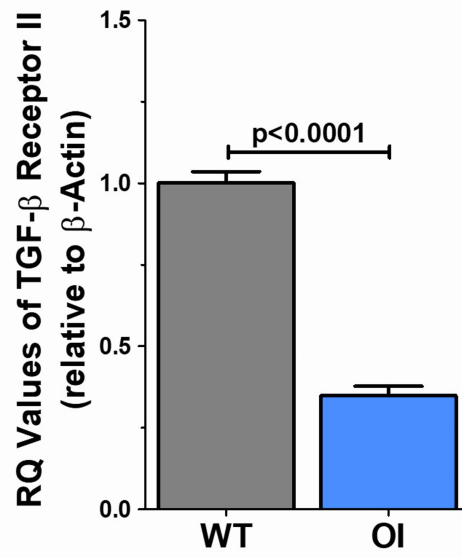



## SUPPLEMENTAL FIGURE TITLES AND LEGENDS

***Figure S1. Gating strategy used for analysis of activation markers (CD44 and CD69) and effector cytokines (IFN- $\gamma$  and TNF- $\alpha$ ). Related to Figure 1 and Figure 3.*** Single cell suspension of splenocytes were stained using antibodies to the indicated antigens and analyzed as shown. Acquired cells were initially gated for lymphocytes by plotting SSC against FSC. Lymphocytes were then gated for single cells by plotting FSH (FSC-height) against FSC-area. The gating was then done for CD4 and CD8 cells, which were further gated for the respective activation marker or the effector cytokine for histogram presentation and obtaining the mean fluorescent intensities (MFI) indicating the extent of expression.

***Figure S2. Gating strategy used for analysis of the Tregs. Related to Figure 1 and Figure 3.*** Single cells suspensions of splenocytes and thymocytes were stained with the respective antibodies and analyzed as shown. Single cell suspension of splenocytes were stained using antibodies to the indicated antigens and analyzed as shown. Acquired cells were initially gated for lymphocytes by plotting SSC against FSC. Lymphocytes were then gated for single cells by plotting FSH (FSC-height) against FSC-area. The gating was then done for CD4<sup>+</sup> T cells and further analyzed for CD25 and FoxP3 as shown.

***Figure S3. TGF- $\beta$  receptor expression is decreased in OI mice. Related to Figure 1.*** RNA was extracted from the splenocytes, and real-time PCR for TGF- $\beta$  Receptors I and II were conducted. A significant decrease was seen in mRNA expression of both TGF- $\beta$  receptor I and II in OI mice as compared to WT mice.
